# Supplementary material
Source: Springer Nature journal article supplement (https://www.springermedizin.de/resource/supplementary/13024_2010_171_MOESM3_ESM.pdf/9643576)

**A**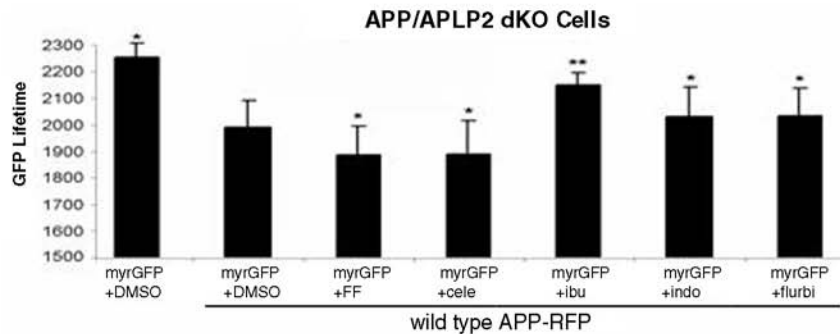**B**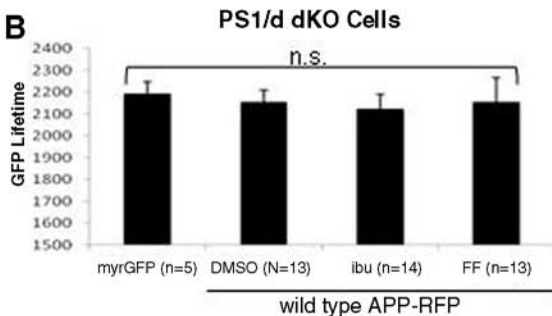**C**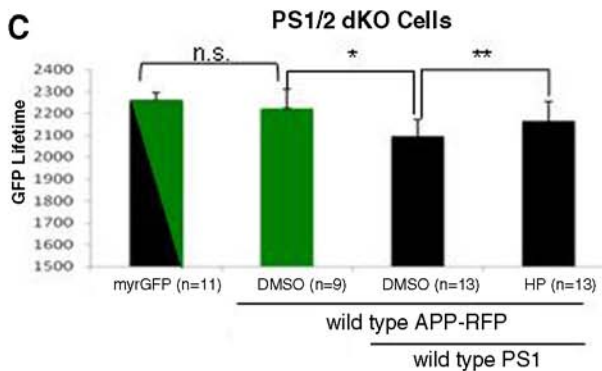

Supplement: MOESM3 [file 9643576]
